# Supplementary figures and images for: Glucose Regulates Free Cytosolic Zn2+ Concentration, Slc39 (ZiP), and Metallothionein Gene Expression in Primary Pancreatic Islet β-Cells
Source: PubMed Central journal article supplement — J Biol Chem. 2011 May 25;286(29):25778–89. doi: 10.1074/jbc.M111.246082 (PMC3138249; doi:10.1074/jbc.m111.246082), 2011-05-25

# Supplementary Figure 1

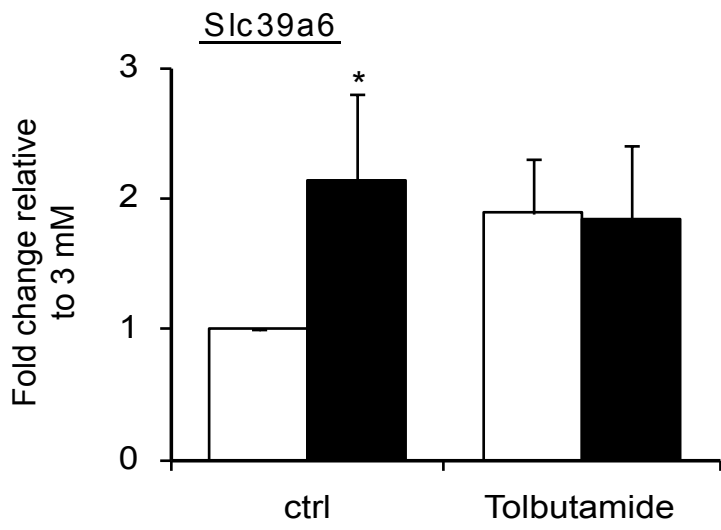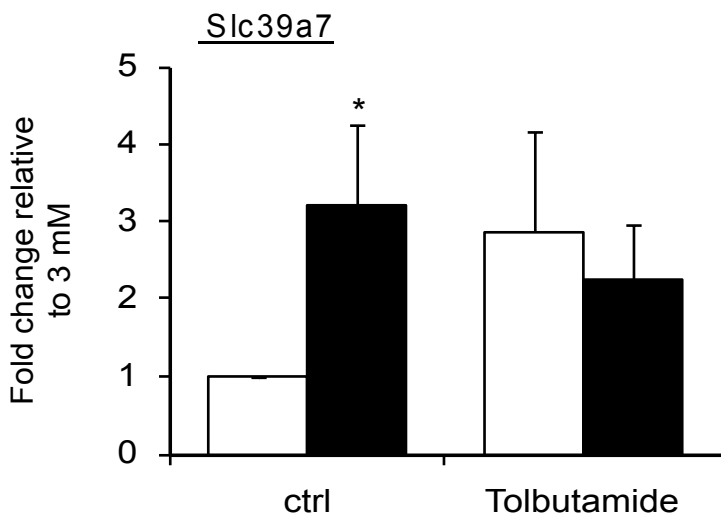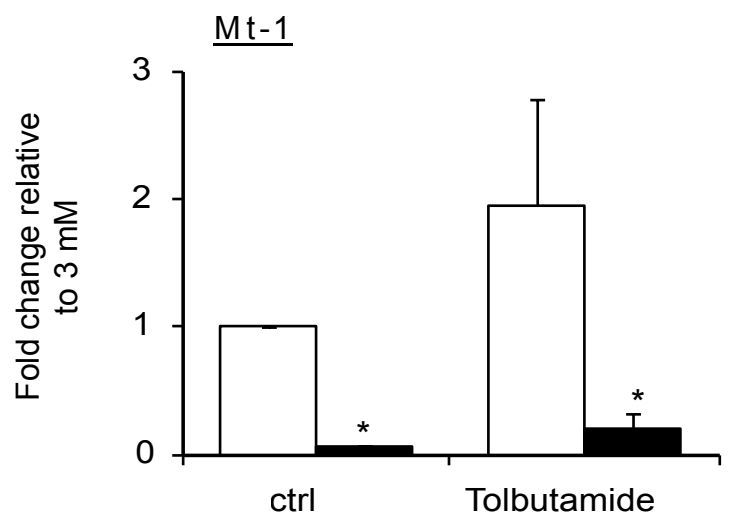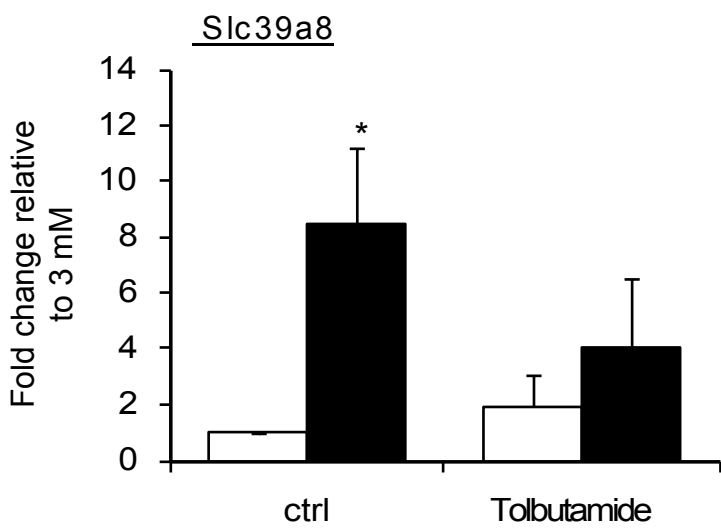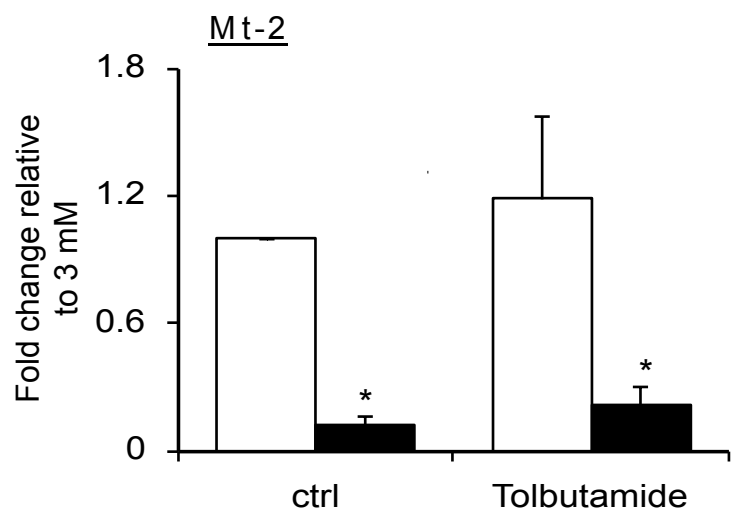

Supplement: supp_M111.246082_jbc.M111.246082-3.pdf [file supp_M111.246082_jbc.M111.246082-3.pdf]
